# Supplementary material for: Additive effect of alkaline earth metals on ammonia decomposition reaction over Ni/Y2O3 catalysts
Source: Royal Society of Chemistry journal article supplement (doi:10.1039/c6ra19005g), 2016-01-01
Supplement: c6ra19005g1.pdf [file c6ra19005g1.pdf]

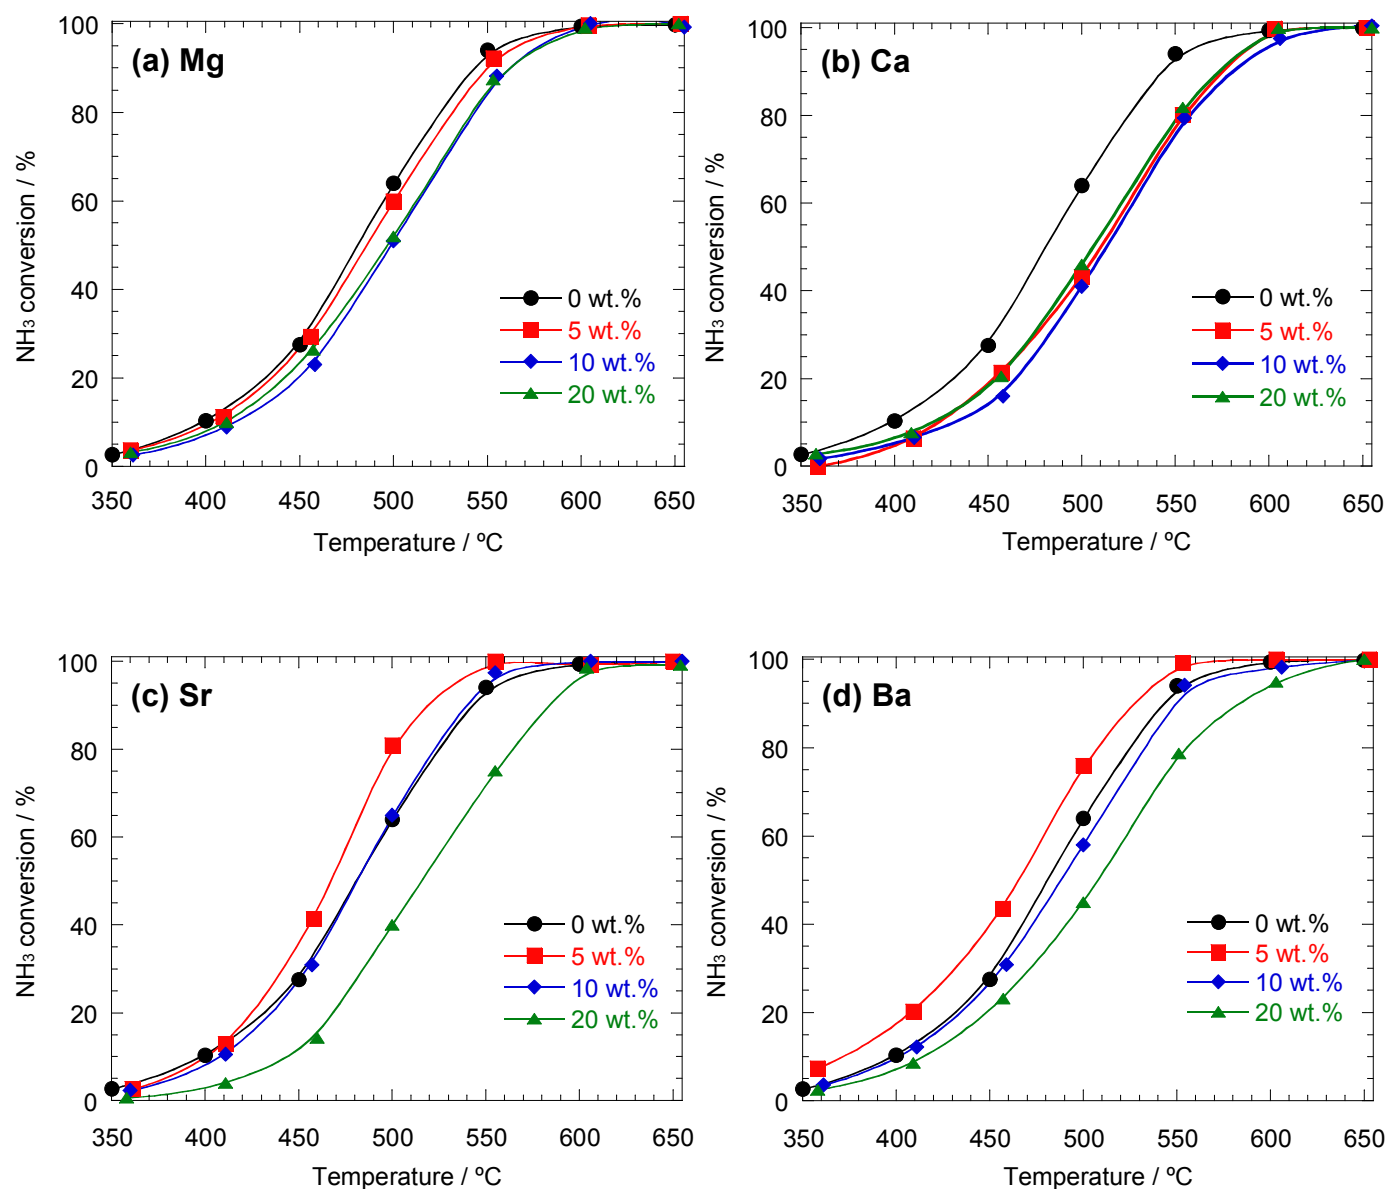

**Fig. S1**  $\text{NH}_3$  conversion for ammonia decomposition over (a)  $x$  wt.% MgO-40 wt.% Ni/ $\text{Y}_2\text{O}_3$ , (b)  $x$  wt.% CaO-40 wt.% Ni/ $\text{Y}_2\text{O}_3$ , (c)  $x$  wt.% SrO-40 wt.% Ni/ $\text{Y}_2\text{O}_3$ , and (d)  $x$  wt.% BaO-40 wt.% Ni/ $\text{Y}_2\text{O}_3$  ( $x = 0, 5, 10, \text{ and } 20$ ). Reaction conditions;  $\text{NH}_3$  100%,  $W/F = 0.60 \text{ g s cm}^{-3}$ .
